# Supplementary material
Source: PubMed Central journal article supplement (PMC4868781)
Supplement: NIHMS767905-supplement-1.pdf [file NIHMS767905-supplement-1.pdf]

**Supplemental Table 1.** *Demographics, therapy, and serology of human subjects.*

|                                   | <b>SLE Patients</b><br>SLEDAI $\geq$ 6 (n = 10) | <b>Healthy Controls</b><br>(n = 14 <sup>†</sup> ) |
|-----------------------------------|-------------------------------------------------|---------------------------------------------------|
| <b>Mean Age (range)</b>           | 30.5 yrs (21-45)                                | 28.5 yrs (19-53)                                  |
| <b>Sex</b>                        |                                                 |                                                   |
| female                            | 8/10                                            | 8/14                                              |
| male                              | 2/10                                            | 5/14                                              |
| <b>Race</b>                       |                                                 |                                                   |
| Caucasian                         | 1/10                                            |                                                   |
| African American                  | 9/10                                            |                                                   |
| <b>Clinical Therapy</b>           |                                                 |                                                   |
| Mycophenolate<br>mofetil/Myfortic | 6/10                                            | 0/14 (1ND)                                        |
| Hydroxychloroquine                | 7/10                                            | 0/14 (1ND)                                        |
| Steroid*                          | 7/10                                            | 0/14 (1ND)                                        |
| Cyclophosphamide                  | 1/10                                            | 0/14 (1ND)                                        |
| Azathioprine                      | 0/10                                            | 0/14 (1ND)                                        |
| <b>Serology</b>                   |                                                 |                                                   |
| ANA                               | 10/10                                           | ND                                                |
| anti-dsDNA <sup>§</sup>           | 8/10                                            | ND                                                |
| anti-Sm                           | 6/10                                            | ND                                                |
| anti-RNP                          | 3/10                                            | ND                                                |
| anti-SSA                          | 5/10                                            | ND                                                |
| anti-SSB                          | 1/10                                            | ND                                                |
| Low C3/C4                         | 6/10 (1ND)                                      | ND                                                |

Numbers indicate patients that were treated with the listed drug at the time of blood draw, or positive for the listed serology tests anytime since diagnosis of SLE. ND = not determined; ANA = anti-nuclear antibodies; dsDNA = double stranded DNA, Sm = Smith antigen; RNP = ribonucleoprotein; SSA = Sjögren's-syndrome-related antigen A (Ro); SSB = Sjögren's-syndrome-related antigen B (La), Low C3/C4 = Decreased complement 3 and complement 4. \*Steroid= All on prednisone except one solumedrol. <sup>†</sup>One sample was from unknown healthy subject from platelet donation center. <sup>§</sup>anti-dsDNA was done on the day of blood draw.

**Supplemental Figure 1.**

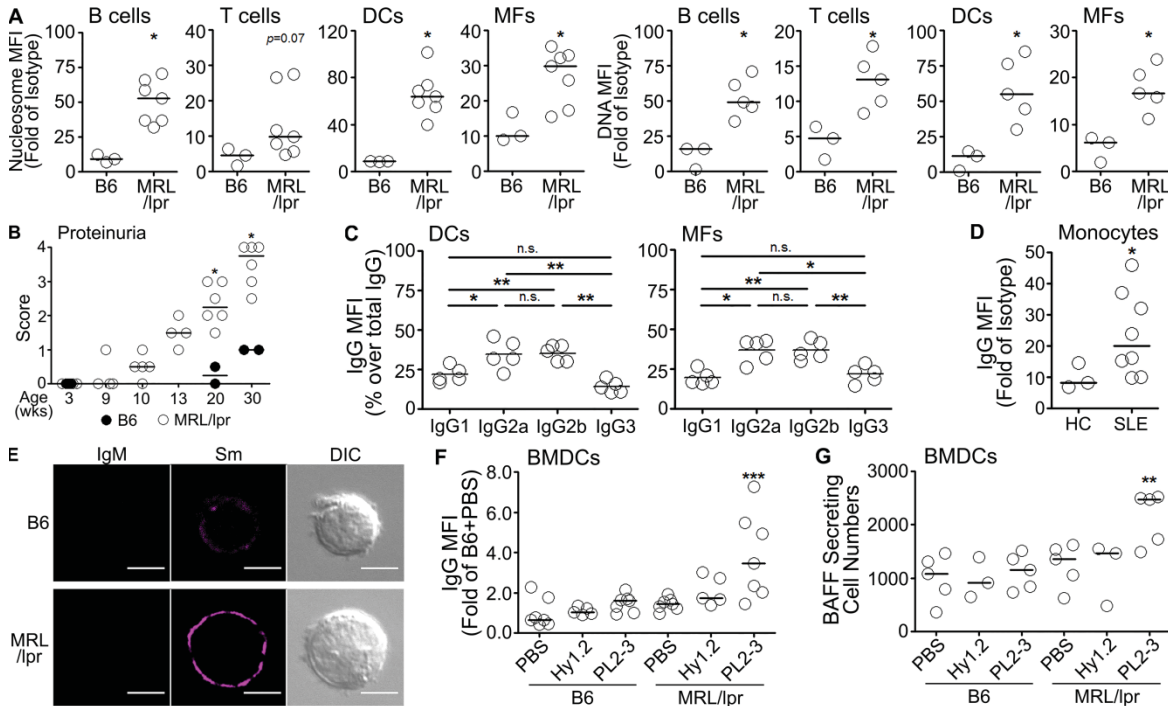

**Supplemental Figure 1. Nuclear self-antigens accumulate on the surface of splenocytes in MRL/lpr mice (A).** Splenic B cells, T cells, DCs, and MFs from B6 and MRL/lpr mice (15-20 weeks old) were stained for surface bound nucleosomes (left 4 panels) or DNA (right 4 panels) with anti-nucleosome (PL2-3) or anti-DNA (33H11) and analyzed by flow cytometry. (n = 3-7 mice, 2 experiments). **(B) MRL/lpr mice show high levels of proteinuria (score >2) beyond 20 weeks of age.** Proteinuria scores were measured on B6 (open circle) or MRL/lpr (dark circle) at different ages. (n = 1-6 mice per age group). **(C) IgG2a and IgG2b are the major isotypes of IgG displayed on the surface of myeloid cells from MRL/lpr mice.** The levels of surface bound IgG1, IgG2a, IgG2b, IgG3, and total IgG on DCs/MFs from MRL/lpr mice were measured by flow cytometry and % of each isotype over total IgG were graphed. (n = 5 mice, 2 experiments). **(D) Monocytes from SLE patients display surface bound IgG.** Whole blood cells from healthy controls (HC) or SLE patients with SLEDAI score >6 were analyzed for the surface bound IgG by flow cytometry. (n = 3-8, 3 experiments). **(E) IgM-ICs do not accumulated on the surface of MRL/lpr MFs.** Isolated splenic MFs from B6 and MRL/lpr mice (>20 weeks old) were stained for surface bound Sm (magenta) and IgM (green) and visualized on confocal microscopy. Representative images from 2 separate experiments. (n = 2 mice per experiment). **(F, G) Accumulation of IgG-ICs on BMDCs induces BAFF secretion.** BMDCs from B6 and MRL/lpr mice were differentiated for 7 days in the presence of 5µg/ml of PL2-3, Hy1.2, or PBS. n= 3-7 mice from 5 experiments. On day 7, **(F)** surface IgG was quantitated by flow cytometry and **(G)** BAFF secreting cells were enumerated by ELISPOT. In (A-D, F, and G), bars represent median. \**p*<0.05, \*\**p*<0.01, \*\*\**p*<0.001, n.s.= not significant by Mann-Whitey test (A-D) or One-way ANOVA test (F, G).

**Supplemental Figure 2.**

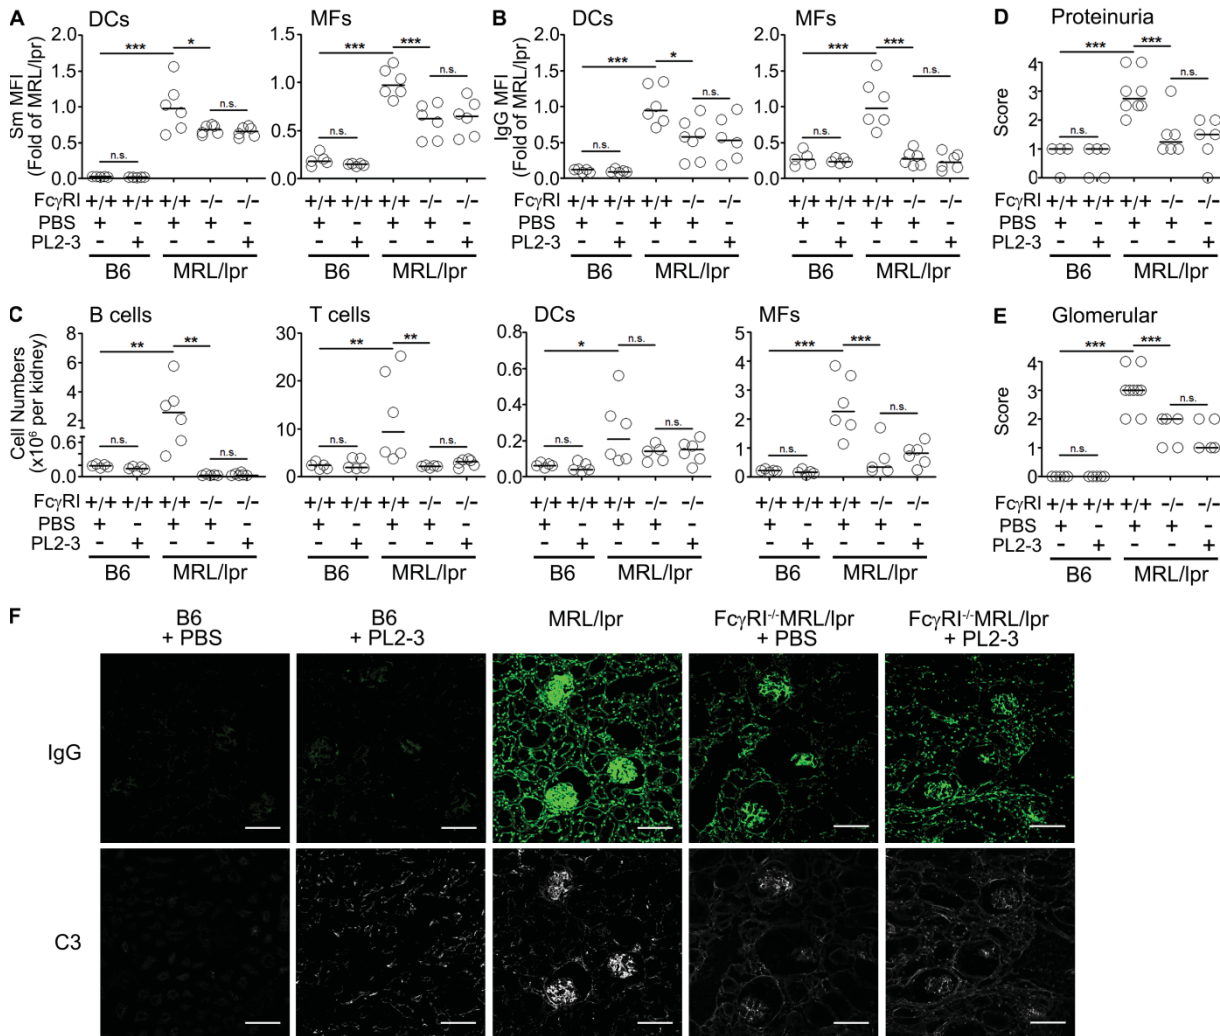

**Supplemental Figure 2. Passive administration of PL2-3 fails to change the levels of surface bound Sm or IgG in B6 or FcγRI<sup>-/-</sup>MRL/lpr mice.** B6 or FcγRI<sup>-/-</sup>MRL/lpr mice (17-18 weeks old) were treated with PBS or PL2-3 (500 mg per mouse) for 5 weeks. PBS treated age-matched sick MRL/lpr mice were included as controls. (n = 5-7 mice per group, 2 experiment). Levels of **(A)** surface bound Sm, or **(B)** IgG on splenic DCs and MFs were analyzed by flow cytometry. **(C) Passive administration of PL2-3 fails to induce cell infiltration into the kidney in B6 or FcγRI<sup>-/-</sup>MRL/lpr mice.** The numbers of B cells, T cells, DCs, and MFs infiltrated in the kidney were enumerated by flow cytometry. **(D, E) Passive administration of PL2-3 fails to increase renal scores of proteinuria or glomerular inflammation in B6 or FcγRI<sup>-/-</sup>MRL/lpr mice.** **(D)** Proteinuria scores, **(E)** Scores for glomerular inflammation were measured using H&E stained kidney sections. **(F) Renal deposits of IgG/C3 in B6 or FcγRI<sup>-/-</sup>MRL/lpr mice did not change following passive administration of PL2-3.** Snap-frozen kidney sections were stained for IgG (upper panels, green) and C3 (lower panels, gray). Representative images are displayed. Original magnification is x20. n = >5. Images are representative of 2 separated experiments. In (A-E), bars represent median. \*p<0.05, \*\*p<0.01, \*\*\*p<0.001, n.s.= not significant by Mann-Whitey test (A-E).
